# Supplementary material for: Entropy-stabilized single-atom Pd catalysts via high-entropy fluorite oxide supports
Source: PubMed Central journal article supplement (PMC7413391; doi:10.1038/s41467-020-17738-9), 2020-08-06
Supplement: 41467_2020_17738_MOESM1_ESM.pdf [file 41467_2020_17738_MOESM1_ESM.pdf]

## **Supplementary Information**

### **Entropy-Stabilized Single-Atom Pd Catalysts via High-Entropy Fluorite Oxide Supports**

Xu et al.

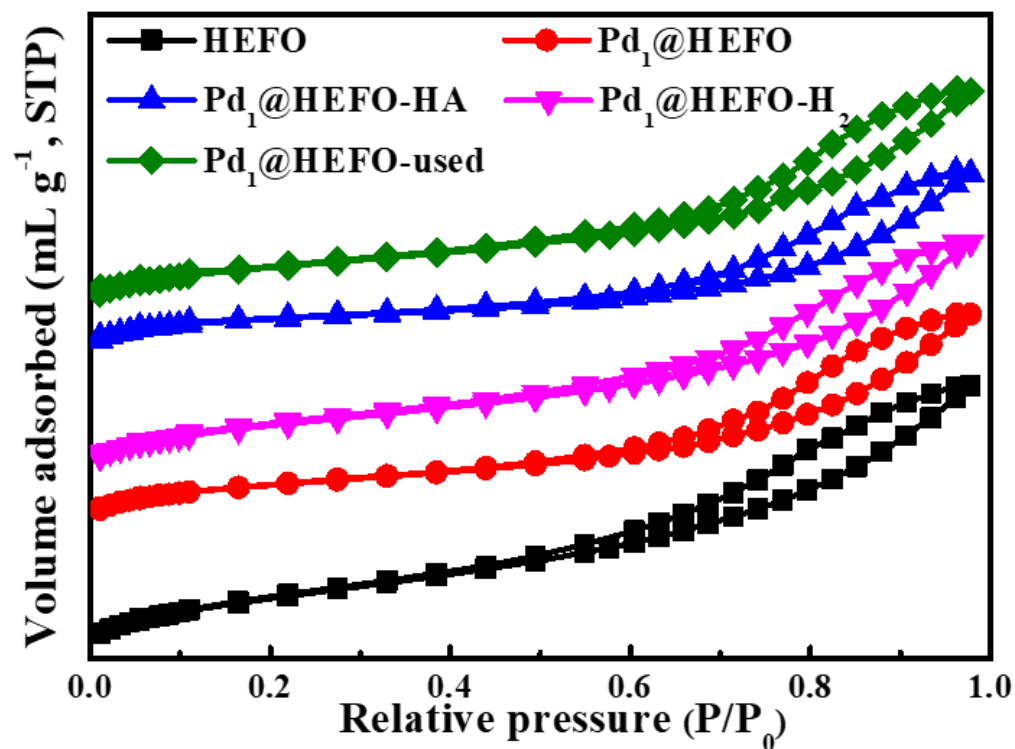

**Supplementary Figure 1. N<sub>2</sub> adsorption-desorption isotherms of HEFO and Pd<sub>1</sub>@HEFO treated under different conditions. Source data are provided as a Source Data file.**

**Supplementary Note 1**

N<sub>2</sub> adsorption–desorption isotherms show that the shape of isotherm and surface area is not affected after introducing Pd and (hydro)thermal treatment.

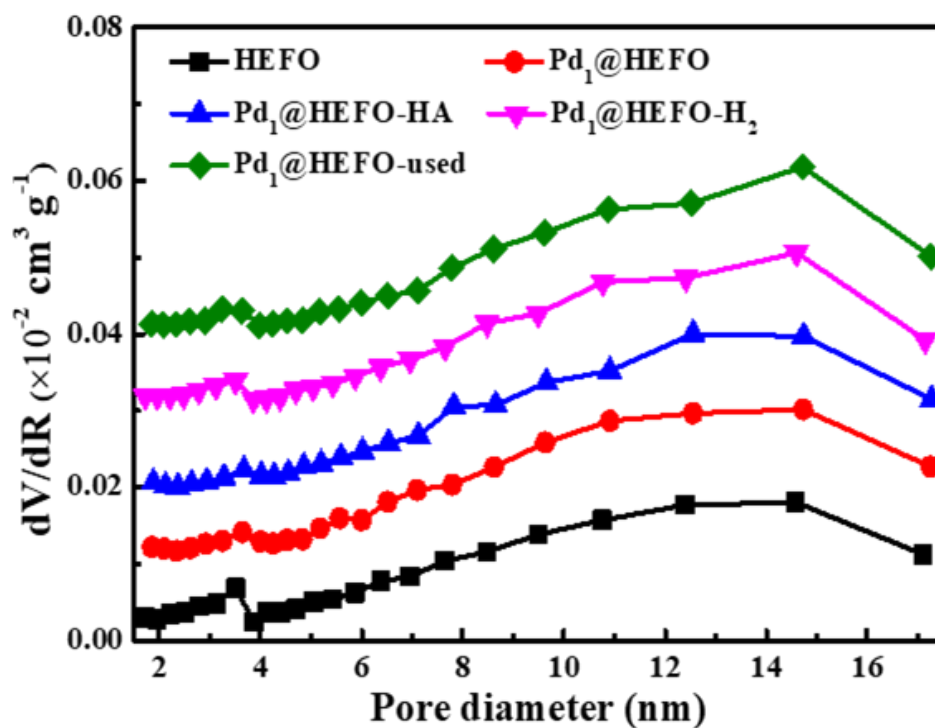

Supplementary Figure 2. Pore size distribution of HEFO and Pd<sub>1</sub>@HEFO treated under different conditions. Source data are provided as a Source Data file.

Supplementary Note 2

Pore size distribution implies that the pore size distribution is not influenced after introducing Pd and (hydro)thermal treatment.

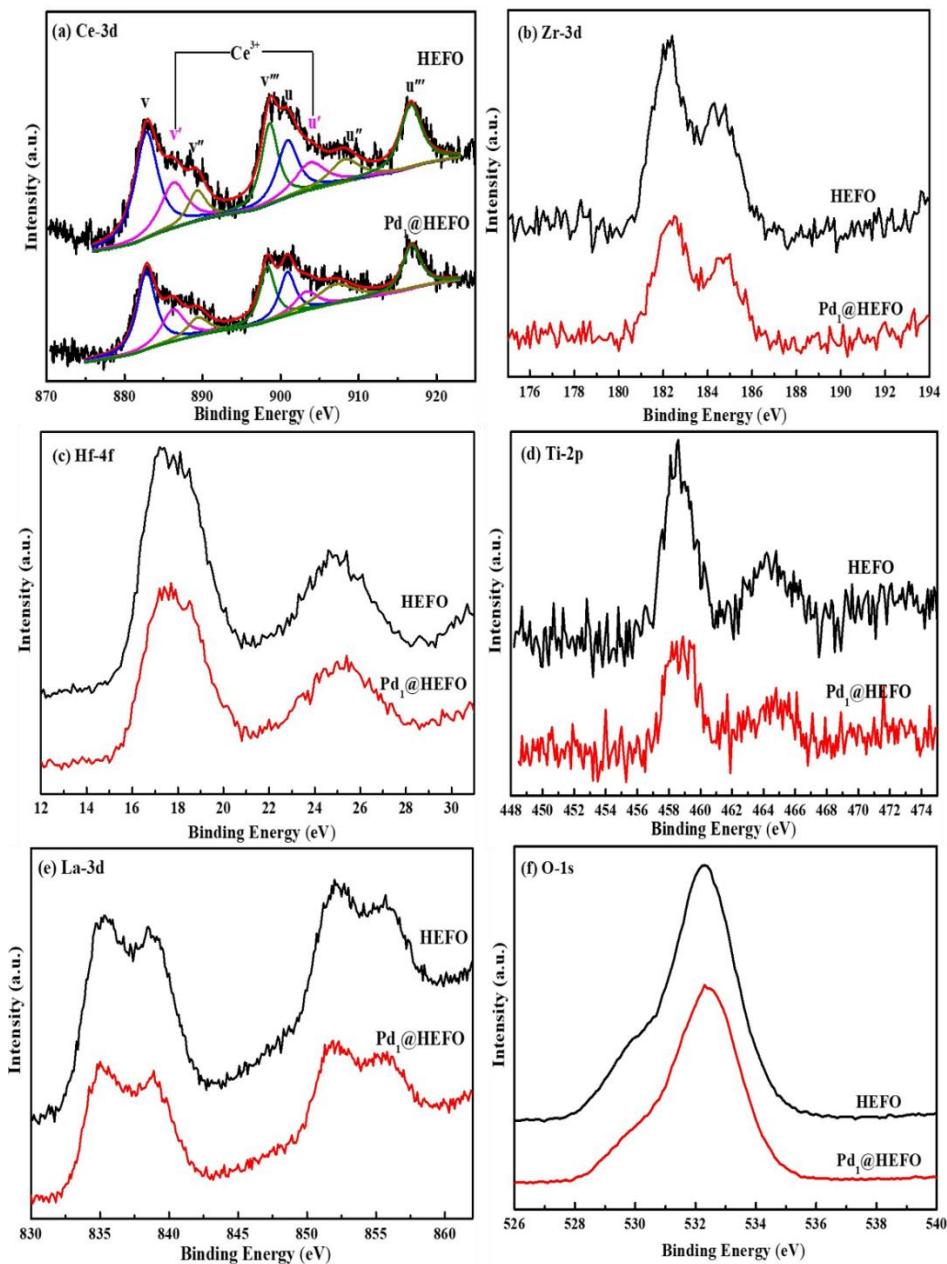

**Supplementary Figure 3. XPS profiles of (a) Ce 3d, (b) Zr 3d, (c) Hf 4f, (d) Ti 2p, (e) La 3d, and (h) O 1s for HEFO and Pd<sub>1</sub>@HEFO. Source data are provided as a Source Data file.**

### Supplementary Note 3

The surface of HEFO is mainly dominated by Zr<sup>4+</sup>, Hf<sup>4+</sup>, Ti<sup>4+</sup>, Ce<sup>4+</sup>, and La<sup>3+</sup>, as elucidated by XPS, which is not influenced by the introduction of Pd into HEFO.

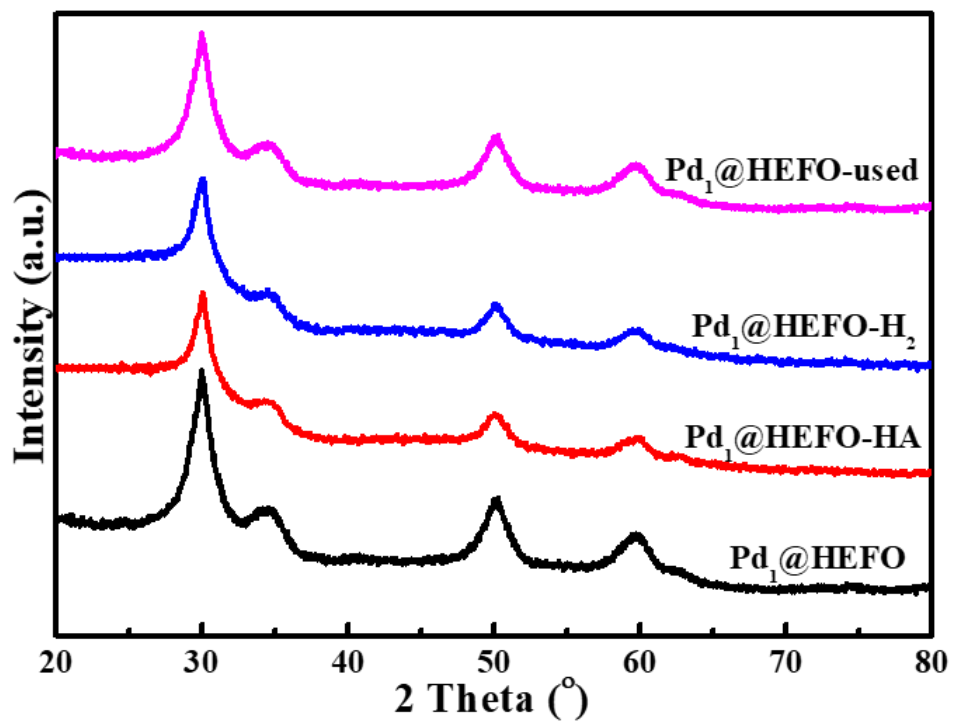

**Supplementary Figure 4. XRD patterns of Pd<sub>1</sub>@HEFO treated under different conditions. Source data are provided as a Source Data file.**

#### **Supplementary Note 4**

The crystalline structure of Pd<sub>1</sub>@HEFO is not influenced after (hydro)thermal treatment.

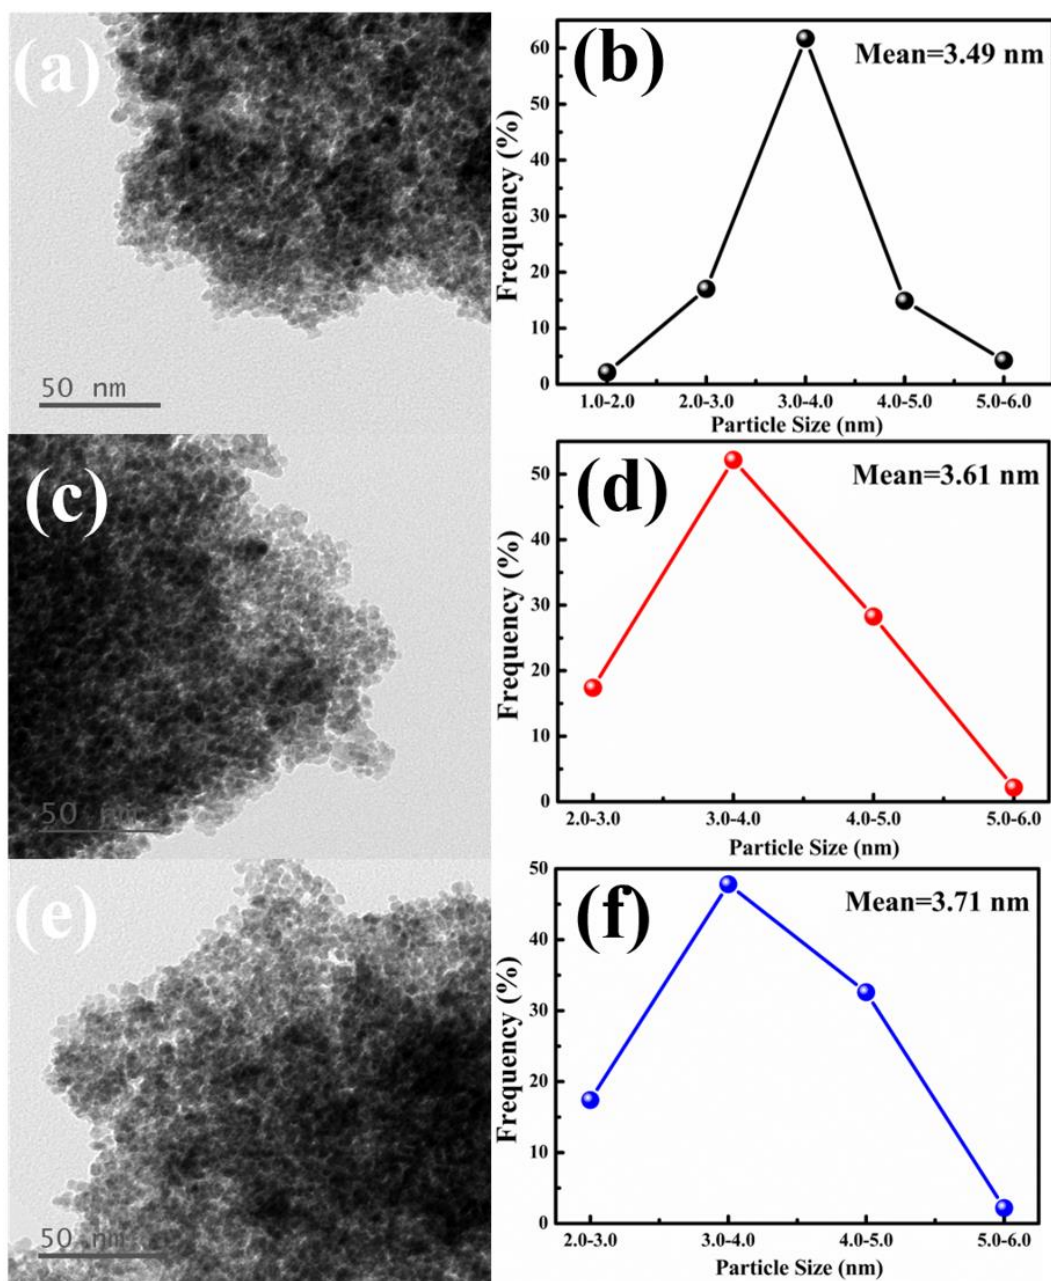

**Supplementary Figure 5. TEM images and particle size distributions of (a) (b) HEFO, (c) (d) Pd<sub>1</sub>@HEFO, and (e) (f) Pd<sub>1</sub>@HEFO-HA. Source data are provided as a Source Data file.**

### Supplementary Note 5

The TEM images show that the morphology and grains size is not affected by the incorporation of Pd into HEFO and hydrothermal treatment. The grains size distribution for all is centered around 4 nm.

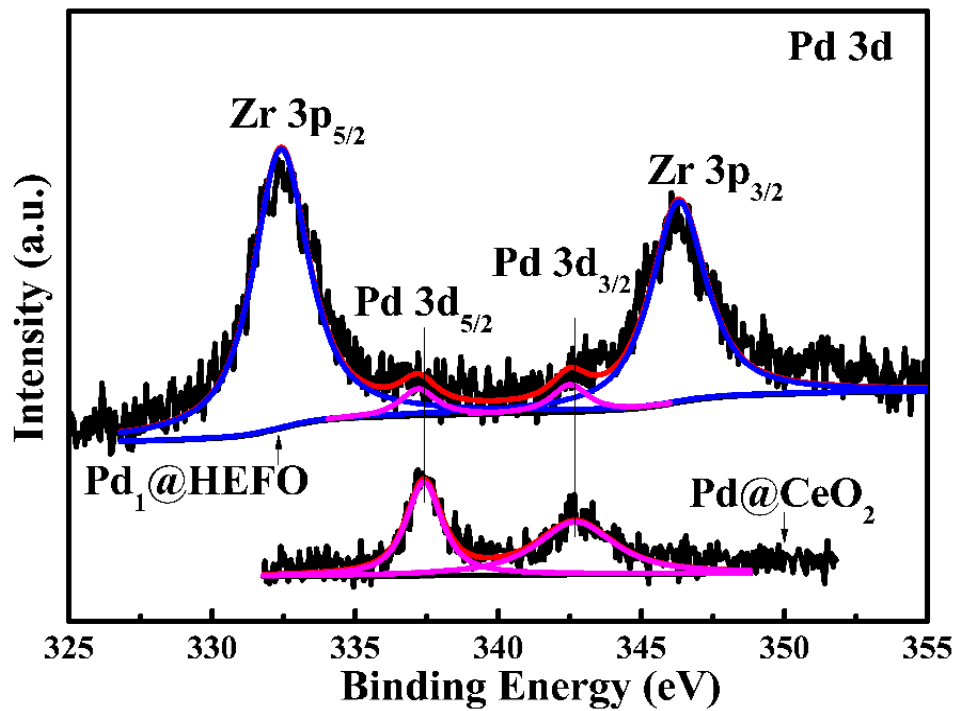

**Supplementary Figure 6. Pd 3d and Zr 3p XPS spectra of Pd<sub>1</sub>@HEFO and Pd@CeO<sub>2</sub>. Source data are provided as a Source Data file.**

### Supplementary Note 6

The obtained binding energy is the characteristic of electron-deficient Pd<sup>4+</sup> both in Pd<sub>1</sub>@HEFO and Pd@CeO<sub>2</sub>.

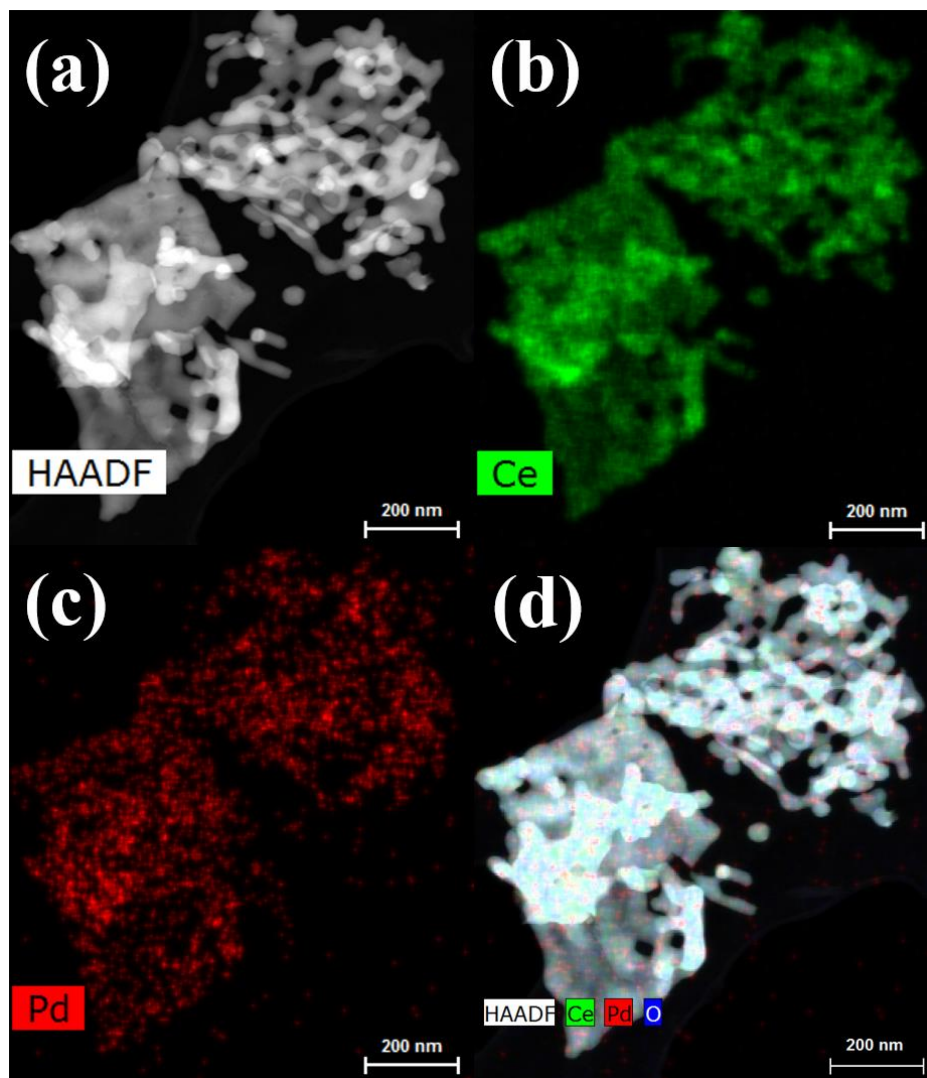

**Supplementary Figure 7.** (a) EDS-mapping of (b) Ce, (c) Pd, and (d) their combined image of Pd@CeO<sub>2</sub>.

### Supplementary Note 7

Compared with Pd<sub>1</sub>@HEFO, obvious Pd clusters are observed from the EDS-Mapping of Pd@CeO<sub>2</sub> with the same synthesis of Pd<sub>1</sub>@HEFO, demonstrating the trait of HEFO as the carrier of SACs rather than CeO<sub>2</sub>.



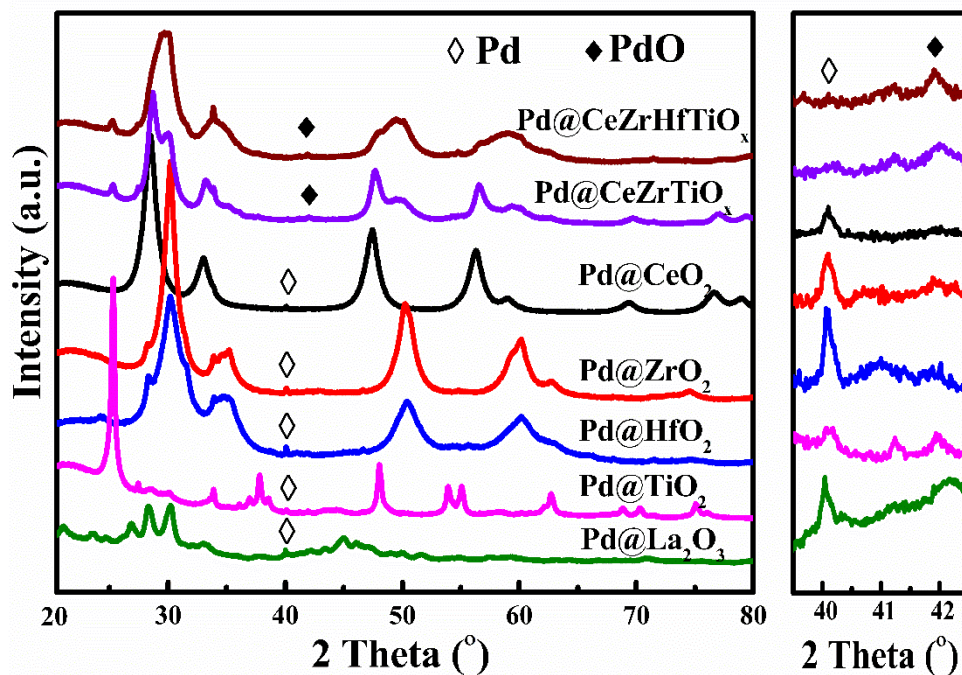

**Supplementary Figure 8.** PXRD pattern of Pd@CeO<sub>2</sub>, Pd@ZrO<sub>2</sub>, Pd@HfO<sub>2</sub>, Pd@TiO<sub>2</sub>, Pd@La<sub>2</sub>O<sub>3</sub>, Pd@CeZrTiO<sub>x</sub>, and Pd@CeZrHfTiO<sub>x</sub>. Source data are provided as a Source Data file.

### Supplementary Note 8

In order to confirm the interaction between Pd and one of the five elements, Pd@CeO<sub>2</sub>, Pd@ZrO<sub>2</sub>, Pd@La<sub>2</sub>O<sub>3</sub>, Pd@HfO<sub>2</sub>, Pd@TiO<sub>2</sub>, ternary Pd@CeZrTiO<sub>x</sub>, and quaternary Pd@CeZrHfTiO<sub>x</sub> were synthesized via the same method of Pd<sub>1</sub>@HEFO. From XRD patterns of all samples, a weak diffraction peak at ca. 40.20° ascribed to metallic Pd was clearly observed in all samples for Pd supported on pure metal oxides. However, its intensity in Pd@CeZrTiO<sub>x</sub> and Pd@CeZrHfTiO<sub>x</sub> was too low to detect. Another weak peak at ca. 42.00° assigned to PdO was also detected in all samples, which is expected for traditional Pd@CeO<sub>2</sub>. However, no peaks attributes Pd or PdO<sub>x</sub> can be observed in Pd@CeZrHfTiLaO<sub>x</sub> from Fig. 2, which illustrates that the formation of stable Pd SACs (Pd<sub>1</sub>@HEFO) originate from the high configurational entropy lattice rather than the strong interactions between Pd and one of the five elements.

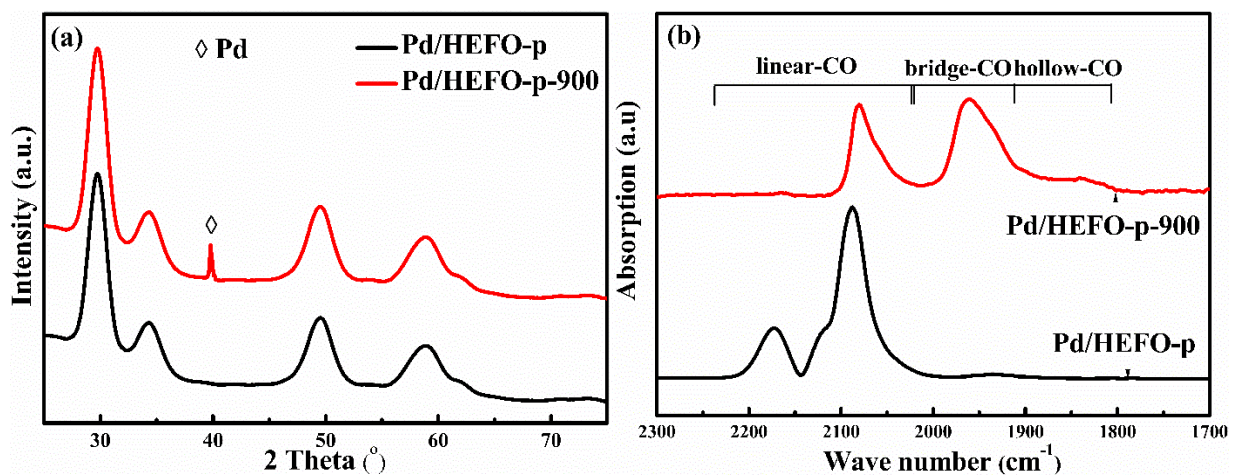

**Supplementary Figure 9. (a) PXRD patterns and (b) CO-DRIFTS spectra of Pd/HEFO and Pd/HEFO-900. Source data are provided as a Source Data file.**

### Supplementary Note 9

No diffraction peaks attributed to Pd or PdO<sub>x</sub> species can be observed in Pd/HEFO from Supplementary Figure 9a. Moreover, only CO frequencies between 2200 and 2000 cm<sup>-1</sup> were clearly seen in Pd/HEFO-p from Supplementary Figure 9b, which is assignable to CO molecules linearly adsorbed on single-atom Pd species in Pd/HEFO-p. After calcined at 900 °C, a sharp peak at ca. 40.18° was observed in XRD pattern of Pd/HEFO-p-900 from Supplementary Figure 9a. Correspondingly, the bridge-CO and hollow-CO bands are obviously observed for Pd/HEFO-900 because of the aggregation of Pd species (Supplementary Figure 9b). The combination of both XRD and CO-DRIFTS results of Pd/HEFO-p and Pd/HEFO-p-900 indicates that Pd can be single-atom dispersed on HEFO via a facile adsorption method. However, the sintering and aggregation of Pd can be obviously observed in Pd/HEFO after calcination at 900 °C. This observation illustrated that the formation of single Pd atoms and the phase formation of high-entropy fluorite oxides proceed simultaneously during the synthesis process, because the formation of Pd–O–M bonds can stabilize single Pd atoms on HEFO for Pd<sub>1</sub>@HEFO.

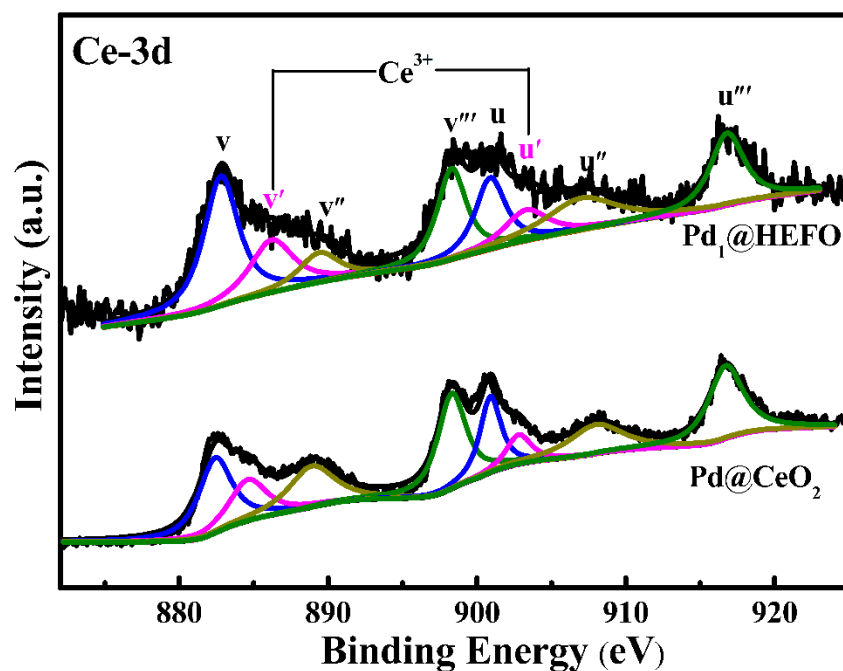

**Supplementary Figure 10.** XPS spectra of Ce 3d of Pd<sub>1</sub>@HEFO and Pd@CeO<sub>2</sub>. Source data are provided as a Source Data file.

### Supplementary Note 10

The XPS spectra of Ce 3d of Pd<sub>1</sub>@HEFO and Pd@CeO<sub>2</sub> are plotted in Supplementary Fig. 10. It can be seen that Ce 3d spectrum was composed of two serial spin orbital multiplets labelled v and u related to four different spin-orbit doublets by the Gaussian-Lorentz fitting procedure. The bands labels as v stand for 3d<sub>5/2</sub> spin-orbit states and those labelled as u represented 3d<sub>3/2</sub> states. Among them, the doublet v' and u' are ascribed to the primary photoemission of Ce<sup>3+</sup>, whereas the other six bands labels as v and u, v'' and u'', v''' and u''' were attributed to Ce<sup>4+</sup>. The relative amount of Ce<sup>3+</sup> could be calculated by the following formula:  $Ce^{3+}\% = \frac{S(v') + S(u')}{S(v) + S(u)} * 100\%$ . The ratio of Ce<sup>3+</sup> in Pd<sub>1</sub>@HEFO is 19.2% which is higher than 10.9% of Pd@CeO<sub>2</sub>.

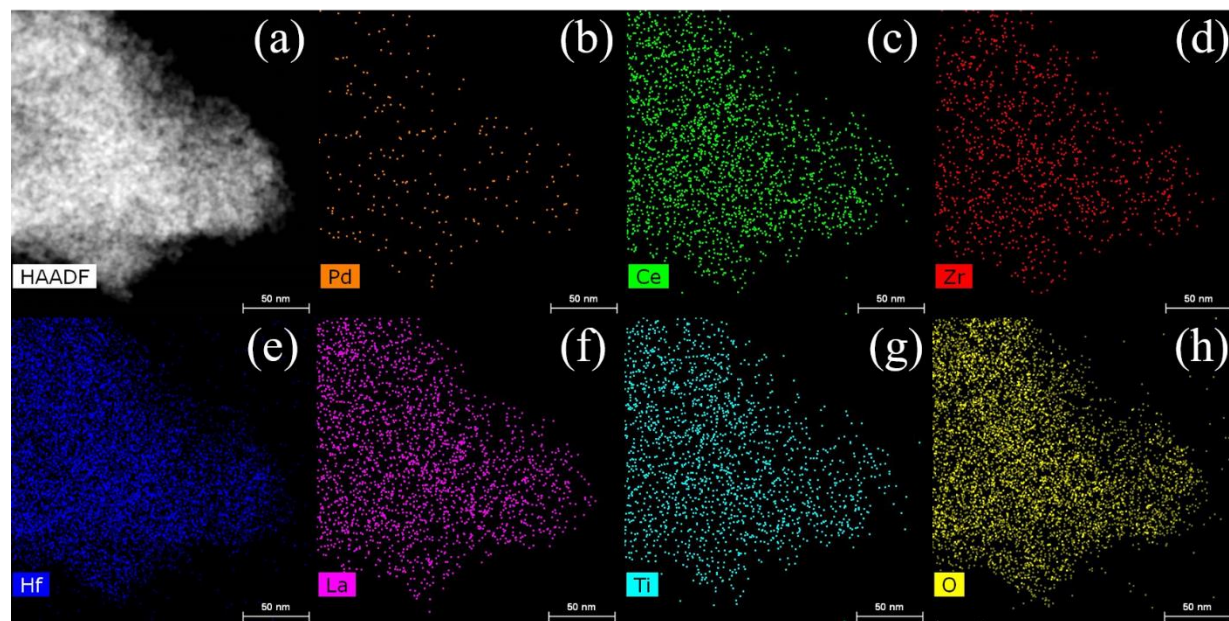

**Supplementary Figure 11.** (a) EDS elements mapping of (b) Pd, (c) Ce, (d) Zr, (e) Hf, (f) Ti, (g) La and (h) O, for Pd<sub>1</sub>@HEFO-HA sample.

### Supplementary Note 11

After introducing Pd into HEFO, all elements are still uniformly dispersed from EDS-mapping without agglomeration and sintering of Pd species detected in Supplementary Figure 11.

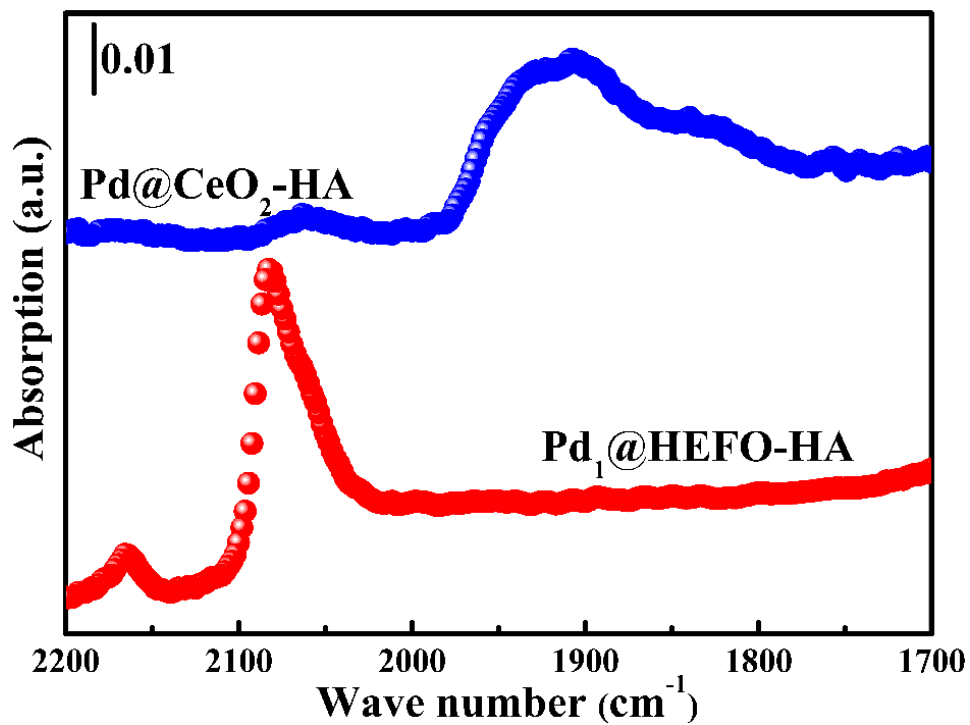

**Supplementary Figure 12. CO-DRIFTS results of Pd<sub>1</sub>@HEFO-HA and Pd/CeO<sub>2</sub>-HA. Source data are provided as a Source Data file.**

### Supplementary Note 12

CO-DRIFTS results show that the absence of the bridge and hollow-CO peaks further validates the existence of single-atom Pd in Pd<sub>1</sub>@HEFO-HA, while the weak linear-CO peak and strong bridge and hollow-CO peaks implies the presence of highly-dispersed Pd in Pd/CeO<sub>2</sub>.

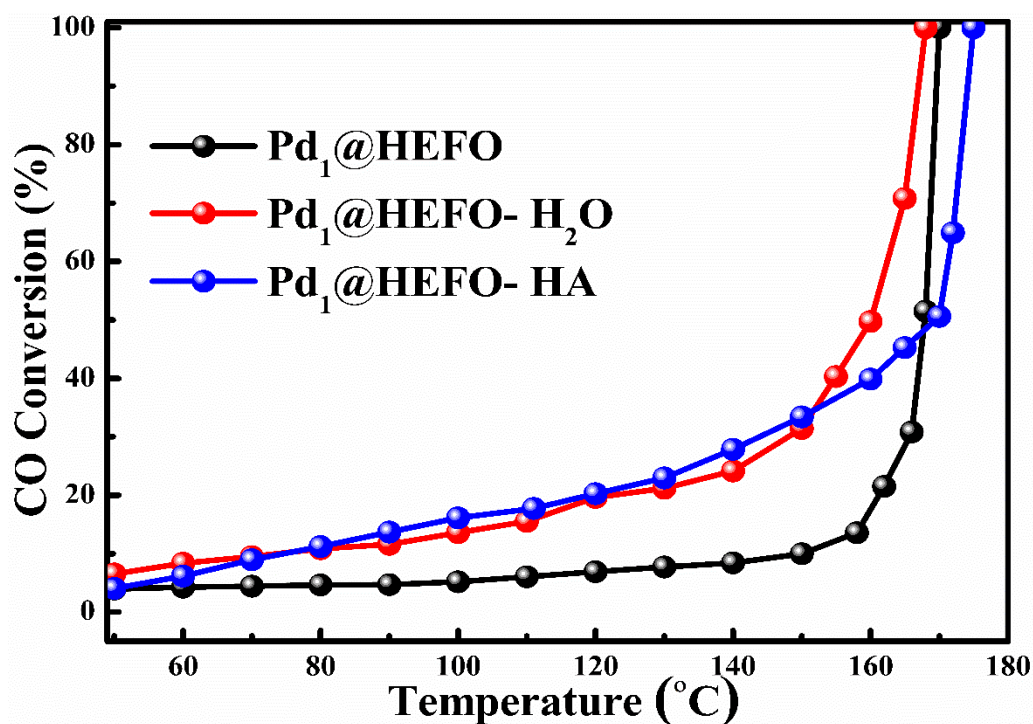

**Supplementary Figure 13.** The effect of H<sub>2</sub>O on the catalytic activity of CO oxidation over Pd<sub>1</sub>@HEFO. Reaction conditions: A catalyst loading of 20 mg, 1 vol.% CO, and 10 vol.% H<sub>2</sub>O balance in air at a gas hourly space velocity of 40,000 mL gcat<sup>-1</sup> hour<sup>-1</sup>. Source data are provided as a Source Data file.

### Supplementary Note 13

In the presence of 10 vol.% H<sub>2</sub>O in the feed, the catalyst shows no deactivation from Supplementary Figure 13. Instead, the activity of CO oxidation is slightly enhanced in the presence of 10 vol.% H<sub>2</sub>O, especially in the low-temperature ranges, which is similar as that of Pd<sub>1</sub>@HEFO-HA. It suggests that Pd<sub>1</sub>@HEFO exhibited a good tolerance with H<sub>2</sub>O.

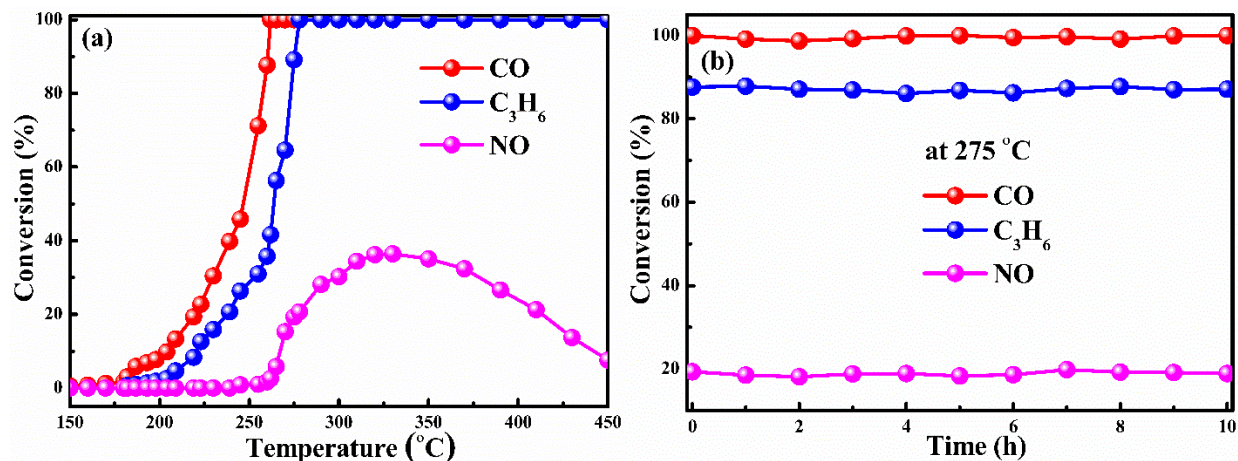

**Supplementary Figure 14. (a) CO, C<sub>3</sub>H<sub>6</sub>, and NO oxidation activity and (b) the stability of Pd<sub>1</sub>@HEFO. Reaction conditions: 1000 ppm CO, 330 ppm C<sub>3</sub>H<sub>6</sub>, 200 ppm NO, 10% O<sub>2</sub>, N<sub>2</sub> balance, a catalyst loading of 150 mg at a high gas hourly space velocity of 200,000 mL gcat<sup>-1</sup> hour<sup>-1</sup> with 500 mL min<sup>-1</sup> of the total gas flow rate. Source data are provided as a Source Data file.**

#### Supplementary Note 14

CO, C<sub>3</sub>H<sub>6</sub>, and NO oxidation activity of Pd<sub>1</sub>@HEFO as a diesel oxidation catalyst (DOC) are supplemented in Supplementary Figure 14a. Pd<sub>1</sub>@HEFO exhibited excellent oxidation activities of CO, C<sub>3</sub>H<sub>6</sub>, and NO at a high gas hourly space velocity (GHSV) of 200,000 mL gcat<sup>-1</sup> hour<sup>-1</sup>, although the  $T_{100}$  of CO oxidation was shifted to ca. 260 °C due to the co-presence of C<sub>3</sub>H<sub>6</sub> and NO and an ultral-high GHSV, which can compare well with that of Pt/CeO<sub>2</sub>-SiAlO<sub>x</sub> as a candidate of DOC<sup>1</sup> and that of Pt/CeO<sub>2</sub><sup>2</sup> under DOC conditions. Moreover, no obvious deactivation of CO, C<sub>3</sub>H<sub>6</sub>, and NO oxidation can be observed over Pd<sub>1</sub>@HEFO in 10 hours from Supplementary Figure 14b, suggesting that Pd<sub>1</sub>@HEFO showed a good DOC activity and stability under a high GHSV, suggesting that entropy-stabled Pd SACs on HEFO can be a candidate of DOC for eliminating emissions from diesel engines.

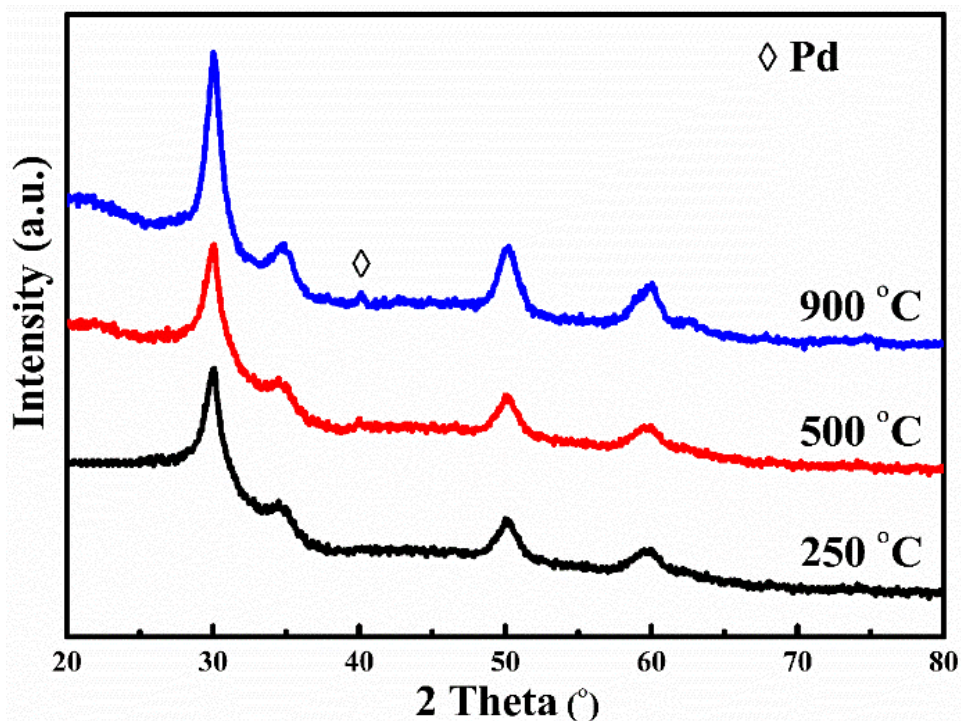

**Supplementary Figure 15.** XRD patterns of Pd<sub>1</sub>@HEFO after H<sub>2</sub> treatment at different temperatures for 2 h. Source data are provided as a Source Data file.

### Supplementary Note 15

No peaks assigned to metallic Pd or PdO<sub>x</sub> can be observed in the sample treated at 250 °C; however, a weak peak at ca. 40.20° attributed to metallic Pd was detected when the treated temperature was increased to 500 °C. The peak intensity was slightly increased when the temperature was further increased to 900 °C. It suggested that single Pd atoms can be stabilized on HEFO in the reductive atmosphere at low temperatures (such as 250 °C). However, further increasing reductive temperature resulted in the sintering and aggregation of reduced Pd. Pd<sub>1</sub>@HEFO calcined at 900 °C in air displayed an excellent performance of CO oxidation, illustrating that the catalyst is suitable for the oxidation reaction under oxygen-rich conditions.



**Supplementary Table 1. Elemental concentrations (atom. %) in Pd<sub>1</sub>@HEFO and Pd@CeO<sub>2</sub> obtained from EDS and ICP.**

| Samples               | Methods | Pd    | Ce     | Zr    | Hf    | Ti    | La    | Chemisorption( $\mu\text{mol CO}/\mu\text{mol Pd}$ ) <sup>a</sup> |
|-----------------------|---------|-------|--------|-------|-------|-------|-------|-------------------------------------------------------------------|
| Pd <sub>1</sub> @HEFO | EDS     | 0.52% | 7.08%  | 7.39% | 7.84% | 7.44% | 7.49% | 0.0644                                                            |
|                       | ICP     | 0.25% | 3.45%  | 3.49% | 3.59% | 3.55% | 3.48% |                                                                   |
| Pd@CeO <sub>2</sub>   | EDS     | 0.53% | 35.69% | -     | -     | -     | -     | -                                                                 |
|                       | ICP     | 0.24% | 14.87% | -     | -     | -     | -     |                                                                   |

<sup>a</sup> CO chemisorption measurements were carried out on a Micromeritics AutoChem II 2920.

### Supplementary Note 16

The results of EDS and ICP both show that the molar ratio of Ce:Zr:Hf:Ti:La is close to 1:1:1:1:1 for Pd<sub>1</sub>@HEFO, further demonstrating that the formation of equimolar high-entropy fluorite oxides. Moreover, the atom concentrations of Pd in both samples are similar as seen from both EDS and ICP.

**Supplementary Table 2. Textural properties of HEFO, Pd<sub>1</sub>@HEFO with different treated conditions and Pd<sub>1</sub>@HEFO-*x* with different Pd loading.**

| <b>Sample</b>                        | <b>BET Surface area<br/>(m<sup>2</sup>/g)</b> | <b>Pore volume<br/>(cm<sup>3</sup>/g)</b> | <b>Pore size<br/>(nm)</b> |
|--------------------------------------|-----------------------------------------------|-------------------------------------------|---------------------------|
| HEFO (900 °C)                        | 162.1                                         | 0.2446                                    | 6.04                      |
| Pd <sub>1</sub> @HEFO-1.0            | 136.5                                         | 0.2099                                    | 6.15                      |
| Pd <sub>1</sub> @HEFO-HA             | 109.6                                         | 0.1695                                    | 6.19                      |
| Pd <sub>1</sub> @HEFO-H <sub>2</sub> | 127.8                                         | 0.1975                                    | 6.18                      |
| Pd <sub>1</sub> @HEFO-used           | 131.8                                         | 0.2037                                    | 6.18                      |
| Pd <sub>1</sub> @HEFO-0.5            | 157.4                                         | 0.2258                                    | 5.73                      |
| Pd <sub>1</sub> @HEFO-1.5            | 119.1                                         | 0.1839                                    | 5.84                      |
| Pd <sub>1</sub> @HEFO-2.0            | 117.3                                         | 0.1653                                    | 5.64                      |

**Supplementary Note 17**

Supplementary Table 2 shows that HEFO as the carrier possesses a high surface area for single-atom dispersion. The incorporation of Pd slightly influences the textural properties of HEFO, and the surface area of Pd<sub>1</sub>@HEFO-*x* increasingly declined by enhancing the loading of Pd until 1.5 wt.%. Importantly, Pd<sub>1</sub>@HEFO displays a strong stability because the surface area is not affected by different thermally treating conditions.

**Supplementary Table 3. Best fitting parameters obtained from Pd K-edge EXAFS analysis of Pd<sub>1</sub>@HEFO, PdO and Pd foil. ( $S_0^2=0.829$ ).**

| Sample                | Shell               | CN <sup>a</sup> | R(Å) <sup>b</sup> | $\sigma^2(\text{Å}^2)$ <sup>c</sup> | $\Delta E_0(\text{eV})$ <sup>d</sup> | R factor |
|-----------------------|---------------------|-----------------|-------------------|-------------------------------------|--------------------------------------|----------|
| Pd <sub>1</sub> @HEFO | Pd–O                | 4.3             | 2.01              | 0.0062                              |                                      |          |
|                       | Pd–O–Zr             | 3.7             | 3.01              | 0.0086                              | -0.9                                 | 0.0151   |
|                       | Pd–O–M <sup>e</sup> | 5.0             | 3.26              | 0.0086                              |                                      |          |
| PdO                   | Pd–O                | 4.0             | 2.02              | 0.0027                              |                                      |          |
|                       | Pd–O–Pd             | 4.1             | 3.06              | 0.0043                              |                                      |          |
|                       | Pd–O–Pd             | 7.5             | 3.44              | 0.0043                              | -0.9                                 | 0.0049   |
|                       | Pd–O                | 7.3             | 3.68              | 0.0062                              |                                      |          |
| Pd foil               | Pd–Pd               | 12              | 2.74              | 0.0056                              | 3.6                                  | 0.0013   |

<sup>a</sup>CN: coordination numbers; <sup>b</sup>R: bond distance; <sup>c</sup> $\sigma^2$ : Debye-Waller factors; <sup>d</sup>  $\Delta E_0$ : the inner potential correction. R factor: goodness of fit.  $S_0^2$  was set to 0.829, according to the experimental EXAFS fit of Pd foil reference by fixing CN as the known crystallographic value. <sup>e</sup>M: M = Ce/La.

### Supplementary Note 18

Pd K-edge EXAFS analysis exhibits that Pd incorporates into the lattice of HEFO and form the single-atom Pd due to the formation of Pd–O–Zr and Pd–O–M (M= Ce/La).

## Supplementary References

1. Ding, X., Qiu, J., Liang, Y., Zhao, M., Wang, J. & Chen, Y. New insights into excellent catalytic performance of the Ce-modified catalyst for CO oxidation, *Ind. Eng. Chem. Res.* **58**, 7876–7885 (2019).
2. Jones, J. *et al.* Thermally stable single-atom platinum-on-ceria catalysts via atom trapping, *Science* **353**, 150–154 (2016).
